# Supplementary material for: Genetic diversity, population structure, and a genome-wide association study of sorghum lines assembled for breeding in Uganda
Source: Front Plant Sci. 2024 Oct 7;15:1458179. doi: 10.3389/fpls.2024.1458179 (PMC11492802; doi:10.3389/fpls.2024.1458179)
Supplement: Supplementary file 1 [file DataSheet1.docx]

**Genetic diversity, population structure, and a genome-wide association study of sorghum lines assembled for breeding in Uganda**

Faizo Kasule1,2,3*****, Boris M.E Alladassi2, Charles John Aru3, Scovia Adikini3, Moses Biruma3, Michael Adrogu Ugen3, Ronald Kakeeto3, and Williams Esuma3,4

1Interdepartmental Genetics and Genomics (IGG), Iowa State University, Ames, IA 50011, USA

2Department of Agronomy, Iowa State University, Ames, IA 50011, USA

3National Semi-Arid Resources Research Institute (NaSARRI), P.O. Box 56, Soroti, Uganda

4National Crops Resources Research Institute (NaCRRI), Namulonge, P.O. Box 7084, Kampala, Uganda

*** Correspondence:**Faizo Kasule
[fkasule@iastate.edu](mailto:fkasule@iastate.edu)

Keywords: **DArT-Seq*,* genetic variation*,* GWAS*,* linkage disequilibrium*,* SNPs*,* sorghum**

**Supplementary tables**

**Table S1.** Passport data of the sorghum accessions used in this study

**(Excel file)**

**Table S2.** The descriptive statistics and genetic parameters of phenotypic traits

| Trait | Minimum | Maximum | Mean | VG | VGxE | Ve | *H2* |
| --- | --- | --- | --- | --- | --- | --- | --- |
| DTF | 58 | 117 | 83 | 16.6 | 0 | 28.8 | 0.54 |
| PH | 67 | 319.5 | 142.7 | 1058 | 118.8 | 115.2 | 0.9 |
| PE | 0 | 25.5 | 3 | 13.45 | 0 | 6.35 | 0.81 |
| GY | 140 | 8300 | 1100 | 93893.5 | 55333 | 144980 | 0.48 |

DTF = Days to 50% flowering (days), PH = Plant height (cm), PE = Panicle exsertion (cm), GY = Grain Yield (kg/ha), VG = Genetic variance, VGxE = Variance of genotype by environment effects; Ve = Error variance, *H2* = Broad-sense heritability

**Table S3.** A summary of the linkage disequilibrium (LD) analysis results among significant SNP marker pairs for each chromosome.

| Chr | Number of significant pairs (*p* <= 0.01) | Average *r*2 | Median *r*2 | Number of pairs in complete LD (*r*2 = 1) |
| --- | --- | --- | --- | --- |
| 1 | 254,769 | 0.068 | 0.039 | 980 |
| 2 | 235,282 | 0.068 | 0.038 | 963 |
| 3 | 217,804 | 0.069 | 0.040 | 925 |
| 4 | 113,678 | 0.072 | 0.039 | 650 |
| 5 | 100,121 | 0.075 | 0.041 | 620 |
| 6 | 148,275 | 0.067 | 0.038 | 761 |
| 7 | 68,482 | 0.069 | 0.039 | 500 |
| 8 | 75,175 | 0.077 | 0.044 | 516 |
| 9 | 97,920 | 0.071 | 0.040 | 607 |
| 10 | 106,725 | 0.076 | 0.042 | 628 |
| Whole genome | 1,418,231 | 0.070 | 0.040 | 7,150 |

Chr = chromosome

**Table S4**. List of significant quantitative trait nucleotides (QTNs) identified by three multi-locus genome-wide association study (GWAS) methods for sorghum quantitative traits.

| Trait | Env | SNP | Chr | Position (bp) | *p*.value | *q.*value | MAF | Effect | Model |
| --- | --- | --- | --- | --- | --- | --- | --- | --- | --- |
| PH | 2021 | S2_16670214 | 2 | 16670214 | 2.00E-06 | 0.02 | 0.11 | 12.27 | FarmCPU |
| Across | S2_5378133 | 2 | 5378133 | 1.00E-06 | 0.01 | 0.37 | -8.43 | FarmCPU |
| DTF | 2021 | S3_61344759 | 3 | 61344759 | 5.00E-06 | 0.03 | 0.25 | 2.22 | FarmCPU |
| 7.00E-06 | 0.05 | 0.25 | 2.23 | MLM |
| 5.00E-06 | 0.04 | 0.25 | 2.23 | MLMM |
| Across | S3_61344759 | 3 | 61344759 | 4.00E-08 | 0 | 0.25 | 2.43 | FarmCPU |
| 9.00E-06 | 0.06 | 0.25 | 2.25 | MLM |
| 3.00E-08 | 0 | 0.25 | 2.36 | MLMM |
| S5_3569592 | 5 | 3569592 | 2.00E-06 | 0.01 | 0.09 | -2.5 | MLMM |
| PE | 2022 | S4_8921335 | 4 | 8921335 | 3.00E-06 | 0.01 | 0.43 | -1.04 | FarmCPU |
| S5_60770709 | 5 | 60770709 | 5.00E-08 | 0 | 0.26 | 1.67 | FarmCPU |
| Across | S7_61349278 | 7 | 61349278 | 3.00E-09 | 0 | 0.09 | 1.95 | FarmCPU |
| S9_375005 | 9 | 375005 | 7.00E-06 | 0.03 | 0.09 | -1.22 | FarmCPU |
| GC | 2021 | S4_56863263 | 4 | 56863263 | 5.00E-07 | 0 | 0.05 | 0.18 | MLMM |
| GY | 2022 | S2_4351947 | 2 | 4351947 | 3.00E-08 | 0 | 0.5 | -129.49 | FarmCPU |
| 8.00E-06 | 0.02 | 0.5 | -191.16 | MLM |
| S6_55680307 | 6 | 55680307 | 4.00E-08 | 0 | 0.06 | 421.76 | FarmCPU |
| 8.00E-08 | 0 | 0.06 | 622.93 | MLM |
| 1.00E-08 | 0 | 0.06 | 592.64 | MLMM |
| S10_1446937 | 10 | 1446937 | 8.00E-08 | 0 | 0.05 | 259.94 | FarmCPU |
| 9.00E-06 | 0.02 | 0.05 | 312.38 | MLM |
| 2.00E-06 | 0.01 | 0.05 | 305.83 | MLMM |

PH = plant height, DTF = days to 50% flowering, PE = panicle exsertion, GC = glume coverage, GY = grain yield, Env = environment, MAF = minor allele frequency, FarmCPU = Fixed and random model circulating probability unification, MLM = Mixed Linear Model, MLMM = Multiple Loci Linear Mixed Model.

**Supplementary figures**

**Supplementary Figure S1:** Distribution of SNPs within the 1Mb window size across the 10 chromosomes of sorghum (Marker density unfiltered)

**Supplementary Figure S2**: A scatter plot of the 543 sorghum accessions showing their distribution along PC1 and PC2, inferring the membership of the accessions based on country of source (A) and origin (B).

**Supplementary Figure S3:** The scatter plot of genome-wide linkage disequilibrium (LD) decay was determined based on the r2 values of the marker pairs. Different colors indicate the different chromosomes.
